# Supplementary material for: Tuning structural topologies of four Ni(ii) coordination polymers through modifying the substitute group of organic ligand
Source: Royal Society of Chemistry journal article supplement (doi:10.1039/c3ce40157j), 2013-01-01
Supplement: c3ce40157j.pdf [file c3ce40157j.pdf]

## Supporting Information

### **Tuning Structural Topologies of FourNi(II) Coordination Polymers Through Modifying the Substitute Group of Organic Ligand**

Feng Guo<sup>a\*</sup>, Baoyong Zhu<sup>a</sup>, Mingli Liu<sup>a</sup>, Xiuling Zhang, Jian Zhang<sup>b\*</sup> and Jiongpeng Zhao<sup>c\*</sup>

<sup>a</sup> Key Laboratory of Coordination Chemistry and Functional Materials in Universities of Shandong, Dezhou University, Shandong 253023, P. R. China. E-mail: guofeng1510@yeah.net. Fax: (+86)-534-8985835; Tel: (+86)-534-8985835.

<sup>b</sup> State Key Laboratory of Structural Chemistry, Fujian Institute of Research on the Structure of Matter, Chinese Academy of Sciences, Fuzhou, Fujian 350002, P. R. China. E-mail: [Zhj@fjirsm.ac.cn](mailto:Zhj@fjirsm.ac.cn). Fax: (+86)-591-83714946; Tel: (+86)-591-83715030.

<sup>c</sup> School of Chemistry and Chemical Engineering, Tianjin University of Technology, Tianjin 300384, P. R. China. E-mail: [horryzhao@yahoo.com](mailto:horryzhao@yahoo.com) Tel: (+86)-22-60214259

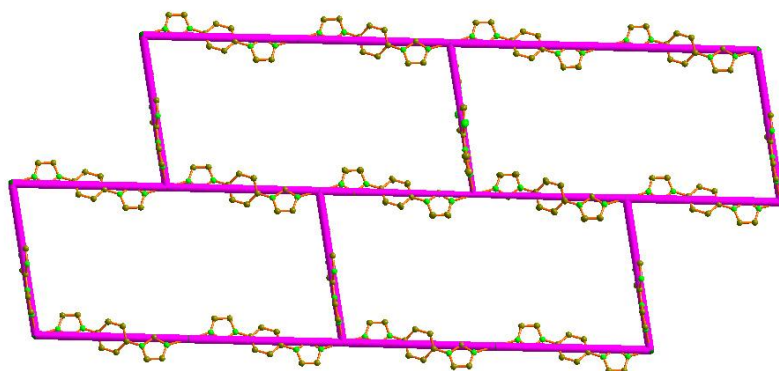

**Fig.S1** The 2D hcb layer structure formed by  $L_1$  ligands in **2**

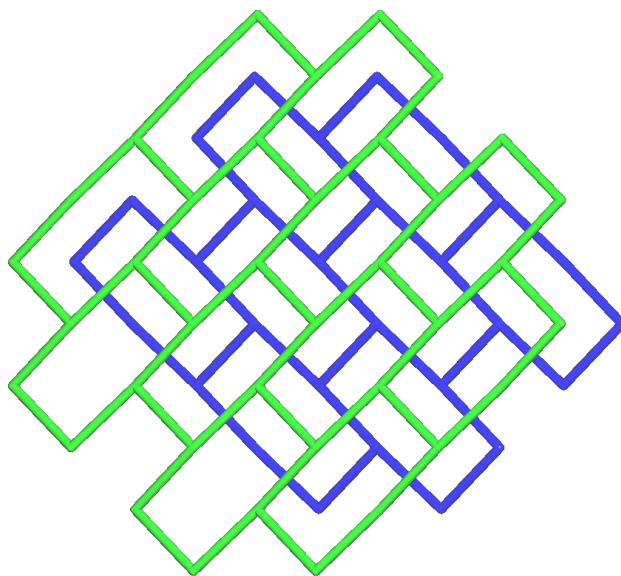

**Fig. S2** the hcb layers adopt AB packed mode in **2**

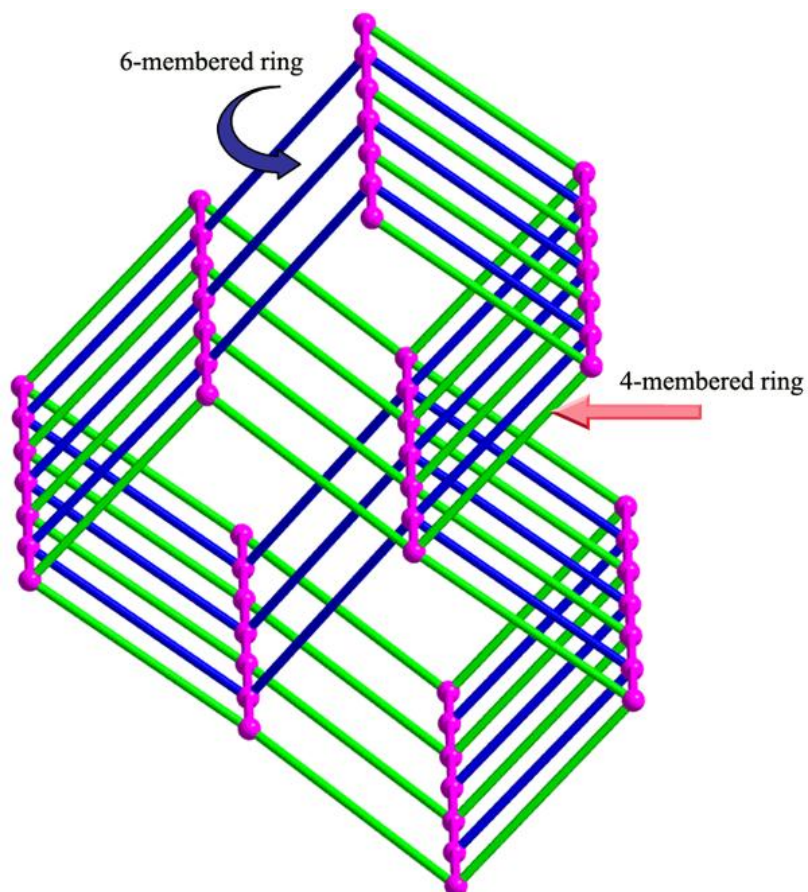

**Fig. S3.** Four- and six-membered rings in **2**

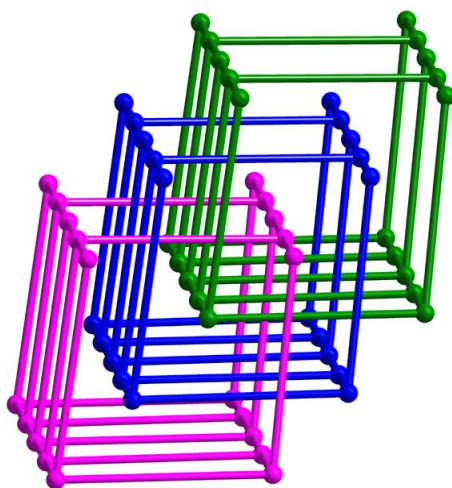

**Fig.S4,** the interpenetrating mode in **2**

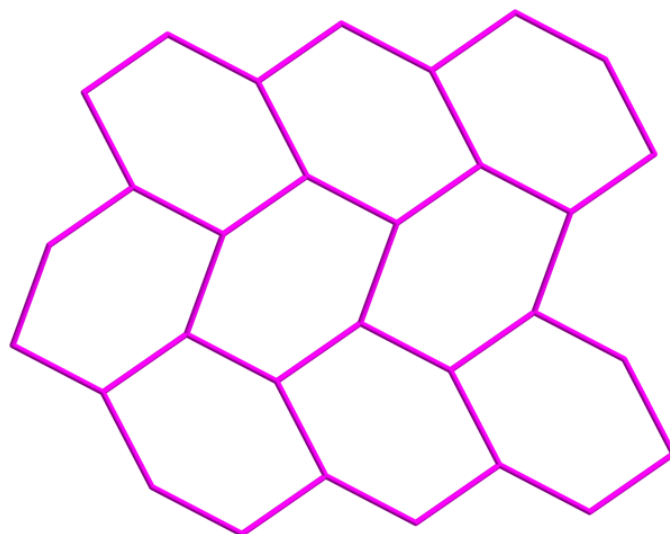

**Fig.S5** the 2D hcb layer in 3

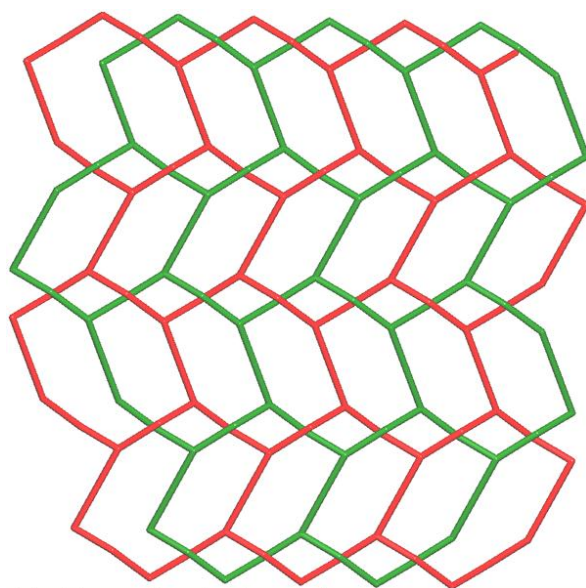

**Fig. S6** The two-fold hcb topological net in 3

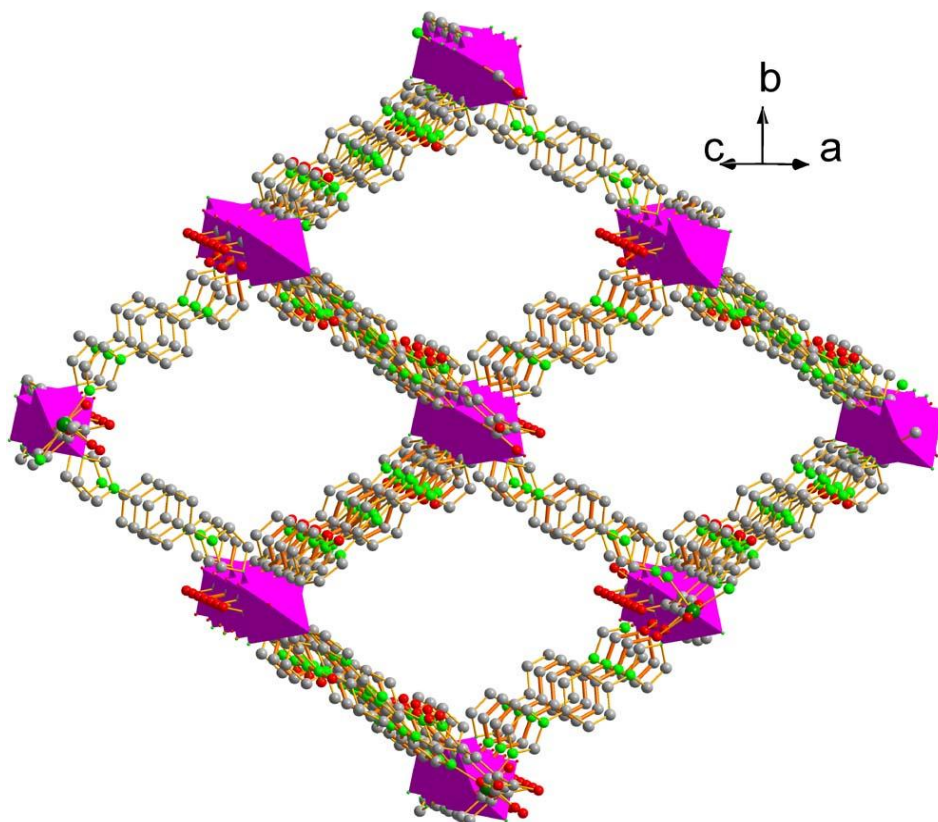

**Fig. S7** The 3D structure for complex 3.

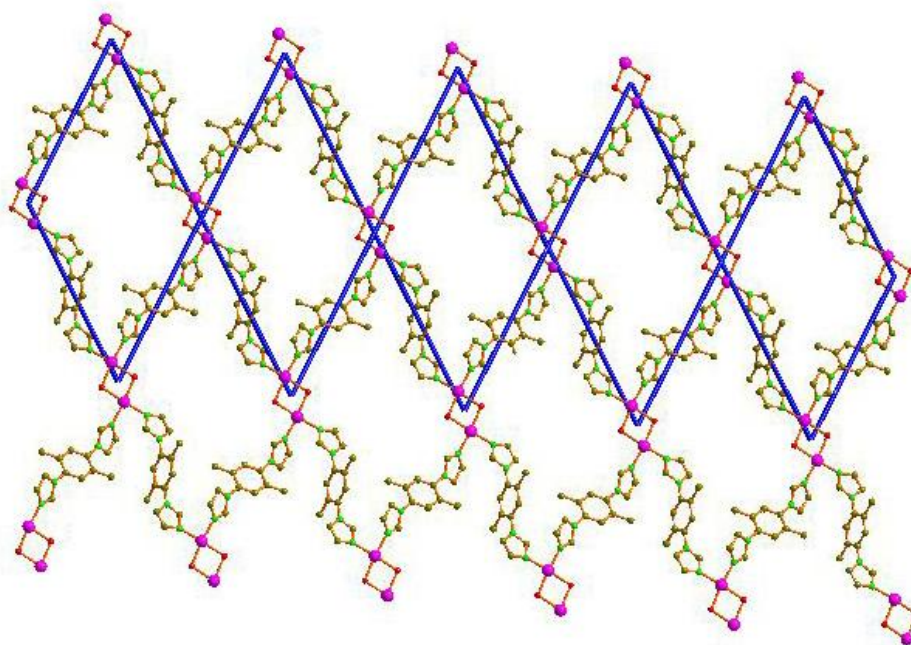

**Fig. S8** The 2D layer formed by the L2 ligands and bridging coordination water molecules.

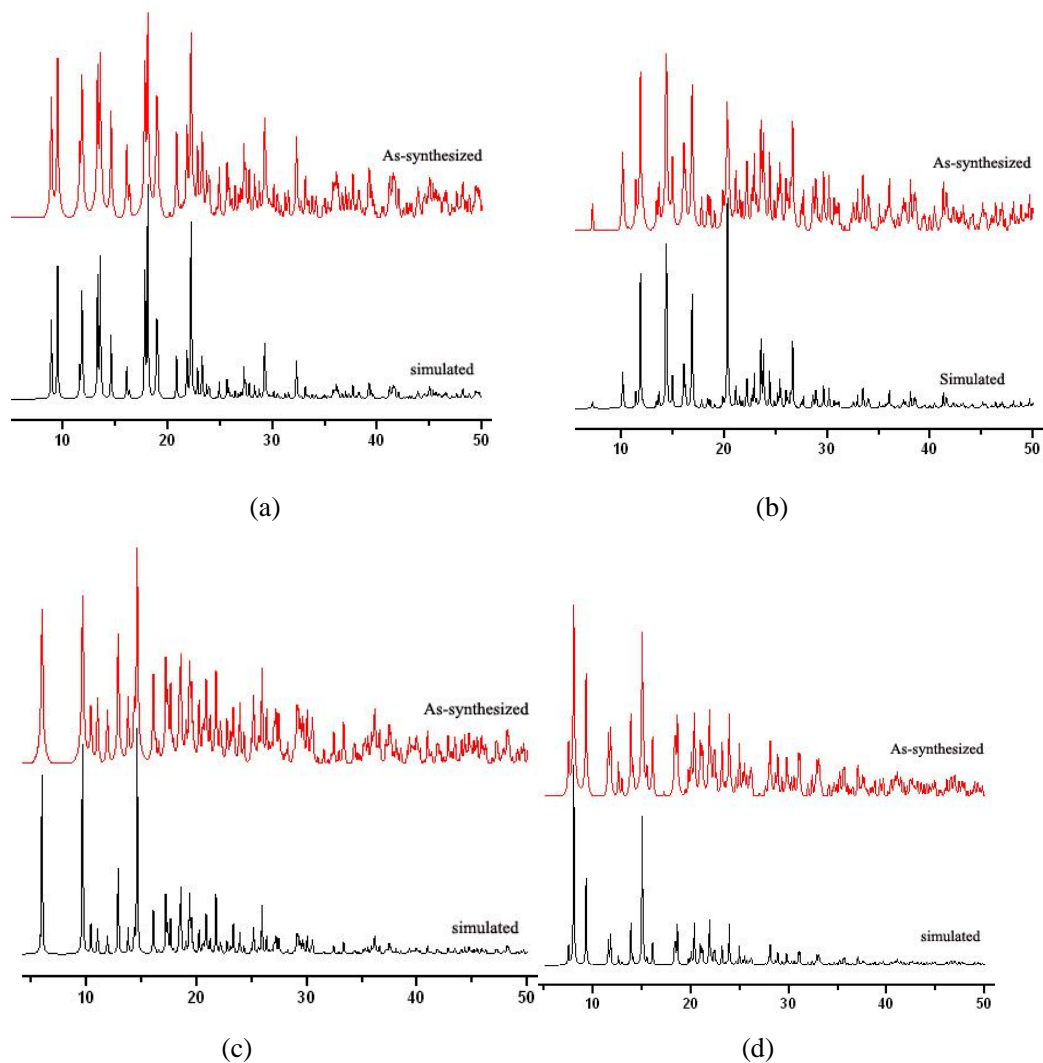

**Fig.S9**XRPD for complexes (a) complex 1; (b) complex 2; (c) complex 3; (d) complex 4.

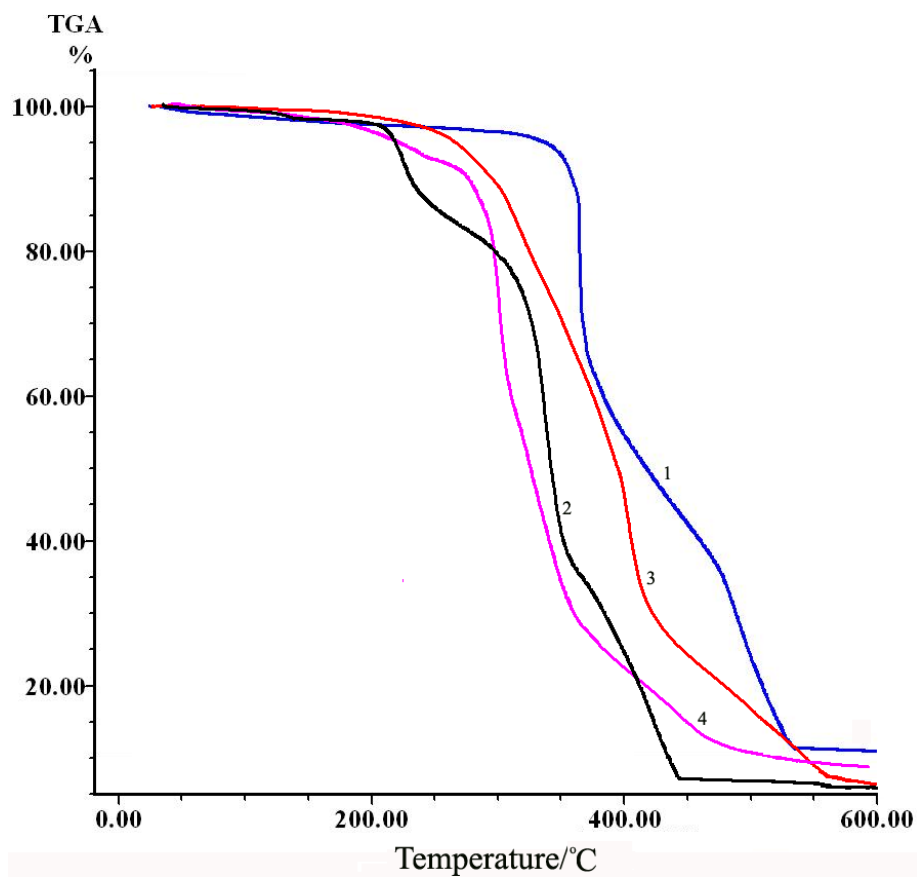

**Fig. S10** The TG curves for complexes 1-4.

**Table S1.** Selected bond lengths (Å) and angles (°) for Complexes 1-4

| Compound 1                                   |             |                                               |             |
|----------------------------------------------|-------------|-----------------------------------------------|-------------|
| Ni(1)—O(1)                                   | 2.0411 (11) | Ni(1)—O(4A) <sup>i</sup>                      | 2.1054 (11) |
| Ni(1)—N(1)                                   | 2.0596 (13) | Ni(1)—O(5)                                    | 2.1173 (12) |
| Ni(1)—N(3)                                   | 2.0797 (14) | Ni(1)—O(3A) <sup>i</sup>                      | 2.1606 (11) |
| O(1)—Ni(1)—N(1)                              | 92.91 (5)   | O(4) <sup>i</sup> —Ni(1)—O(5)                 | 167.67 (5)  |
| O(1)—Ni(1)—N(3)                              | 87.79 (5)   | O(1)—Ni(1)—O(3A) <sup>i</sup>                 | 157.84 (4)  |
| N(1)—Ni(1)—N(3)                              | 178.21 (5)  | N(1)—Ni(1)—O(3A) <sup>i</sup>                 | 90.76 (5)   |
| O(1)—Ni(1)—O(4A) <sup>i</sup>                | 95.91 (4)   | N(3)—Ni(1)—O(3A) <sup>i</sup>                 | 89.21 (5)   |
| N(1)—Ni(1)—O(4A) <sup>i</sup>                | 93.77 (5)   | O(4A) <sup>i</sup> —Ni(1)—O(3A) <sup>i</sup>  | 62.03 (4)   |
| N(3)—Ni(1)—O(4A) <sup>i</sup>                | 87.80 (5)   | O(5)—Ni(1)—O(3A) <sup>i</sup>                 | 106.20 (5)  |
| O(1)—Ni(1)—O(5)                              | 95.66 (5)   | N(3)—Ni(1)—O(5)                               | 88.41 (5)   |
| N(1)—Ni(1)—O(5)                              | 89.87 (5)   |                                               |             |
| Compound 2                                   |             |                                               |             |
| Ni(1)—O(4A) <sup>i</sup>                     | 2.0561 (16) | Ni(1)—N(3)                                    | 2.0715 (18) |
| Ni(1)—O(1)                                   | 2.0616 (15) | Ni(1)—N(1)                                    | 2.0936 (18) |
| Ni(1)—N(7)                                   | 2.0711 (17) | Ni(1)—O(7)                                    | 2.1331 (18) |
| O(4A) <sup>i</sup> —Ni(1)—O(1)               | 178.26 (6)  | N(3)—Ni(1)—N(1)                               | 92.36 (7)   |
| O(4A) <sup>i</sup> —Ni(1)—N(7)               | 87.81 (7)   | O(4A) <sup>i</sup> —Ni(1)—O(7)                | 89.78 (8)   |
| O(1)—Ni(1)—N(7)                              | 91.90 (7)   | O(1)—Ni(1)—O(7)                               | 91.92 (7)   |
| O(4A) <sup>i</sup> —Ni(1)—N(3)               | 92.75 (7)   | N(7)—Ni(1)—O(7)                               | 87.14 (8)   |
| O(1)—Ni(1)—N(3)                              | 87.61 (7)   | N(3)—Ni(1)—O(7)                               | 90.49 (8)   |
| N(7)—Ni(1)—N(3)                              | 177.56 (7)  | N(1)—Ni(1)—O(7)                               | 177.12 (7)  |
| O(4A) <sup>i</sup> —Ni(1)—N(1)               | 90.57 (8)   | N(7)—Ni(1)—N(1)                               | 90.01 (7)   |
| O(1)—Ni(1)—N(1)                              | 87.71 (7)   |                                               |             |
| Compound 3                                   |             |                                               |             |
| Ni(1)—O(1)                                   | 2.0283 (12) | Ni(1)—N(3)                                    | 2.0850 (15) |
| Ni(1)—N(6A) <sup>i</sup>                     | 2.0605 (14) | Ni(1)—O(3A) <sup>ii</sup>                     | 2.1788 (12) |
| Ni(1)—N(1)                                   | 2.0733 (15) | Ni(1)—O(4A) <sup>ii</sup>                     | 2.2014 (14) |
| O(1)—Ni(1)—N(6A) <sup>i</sup>                | 95.23 (6)   | O(1)—Ni(1)—O(4A) <sup>ii</sup>                | 101.07 (5)  |
| O(1)—Ni(1)—N(1)                              | 88.87 (6)   | N(6A) <sup>i</sup> —Ni(1)—O(4A) <sup>ii</sup> | 87.50 (6)   |
| N(6A) <sup>i</sup> —Ni(1)—N(1)               | 172.95 (6)  | N(1)—Ni(1)—O(4A) <sup>ii</sup>                | 86.08 (6)   |
| O(1)—Ni(1)—N(3)                              | 105.52 (6)  | N(3)—Ni(1)—O(4A) <sup>ii</sup>                | 152.94 (5)  |
| N(6A) <sup>i</sup> —Ni(1)—N(3)               | 94.98 (6)   | O(3) <sup>ii</sup> —Ni(1)—O(4A) <sup>ii</sup> | 60.19 (4)   |
| N(1)—Ni(1)—N(3)                              | 89.43 (6)   | N(1)—Ni(1)—O(3A) <sup>ii</sup>                | 87.77 (5)   |
| O(1)—Ni(1)—O(3A) <sup>ii</sup>               | 161.15 (5)  | N(3)—Ni(1)—O(3A) <sup>ii</sup>                | 93.00 (5)   |
| N(6A) <sup>i</sup> —Ni(1)—O(3) <sup>ii</sup> | 86.51 (5)   |                                               |             |
| Compound 4                                   |             |                                               |             |
| Ni(1)—O(1)                                   | 2.0175(12)  | Ni(1)—N(3)                                    | 2.1073(16)  |
| Ni(1)—O(4A) <sup>i</sup>                     | 2.0206(12)  | Ni(1)—O(7)                                    | 2.1295(13)  |
| Ni(1)—N(1)                                   | 2.0547(15)  | Ni(1)—O(7A) <sup>ii</sup>                     | 2.1795(13)  |
| O(1)—Ni(1)—O(4A) <sup>i</sup>                | 179.11 (5)  | O(1)—Ni(1)—O(7A) <sup>ii</sup>                | 89.98 (6)   |



|                                |           |                                               |            |
|--------------------------------|-----------|-----------------------------------------------|------------|
| O(1)—Ni(1)—N(1)                | 89.37 (5) | O(4A) <sup>i</sup> —Ni(1)—O(7A) <sup>ii</sup> | 89.13 (5)  |
| O(4A) <sup>i</sup> —Ni(1)—N(1) | 90.49 (5) | N(1)—Ni(1)—O(7A) <sup>ii</sup>                | 94.32 (6)  |
| O(1)—Ni(1)—N(3)                | 90.11 (6) | N(3)—Ni(1)—O(7A) <sup>ii</sup>                | 176.50 (5) |
| O(4A) <sup>i</sup> —Ni(1)—N(3) | 90.76 (6) | O(7)—Ni(1)—O(7A) <sup>ii</sup>                | 78.76 (6)  |
| N(1)—Ni(1)—N(3)                | 89.18 (6) | N(1)—Ni(1)—O(7)                               | 172.95 (6) |
| O(1)—Ni(1)—O(7)                | 89.29 (5) | N(3)—Ni(1)—O(7)                               | 97.75 (6)  |
| O(4A) <sup>i</sup> —Ni(1)—O(7) | 90.75 (5) |                                               |            |

Symmetry codes: 1: (i)  $x-1, y, z$ ; 2: (i)  $x-1, -y+1/2, z-1/2$ ; 3: (i)  $-x, y+1, -z+1/2$ ; (ii)  $x-1/2, y-1/2, z$ ; 4: (i)  $x-1/2, -y+1/2, z-1/2$ ; (ii)  $-x+1/2, -y+1/2, -z$ ;

### Topological analysis for complex 2:

#####

1:C20 N5 Ni2.50 O10

#####

Topology for Ni1

-----

Atom Ni1 links by bridge ligands and has

| Common vertex with | R(A-A)  |         |        |           |         |   |
|--------------------|---------|---------|--------|-----------|---------|---|
| Ni 1               | 1.7997  | 0.2516  | 1.2621 | ( 1 0 0)  | 11.022A | 1 |
| Ni 1               | -0.2003 | 0.2516  | 0.2621 | (-1 0 -1) | 11.022A | 1 |
| Ni 1               | 1.2003  | -0.2484 | 0.2379 | ( 2 0 1)  | 13.545A | 1 |
| Ni 1               | 0.2003  | -0.2484 | 1.2379 | ( 1 0 2)  | 13.657A | 1 |
| Ni 1               | 0.2003  | 0.7516  | 1.2379 | ( 1 1 2)  | 13.727A | 1 |

-----

Structural group analysis

-----

-----

Structural group No 1

-----

Structure consists of 3D framework with Ni

There are 3 interpenetrating nets

FIV: Full interpenetration vectors

-----

[1,0,0] (8.40A)

-----

PIC: [3,0,0][0,1,0][1,0,-1] (PICVR=3)

Zt=3; Zn=1

Class Ia Z=3

Coordination sequences

-----

|      |   |    |    |     |     |     |     |     |      |      |
|------|---|----|----|-----|-----|-----|-----|-----|------|------|
| Ni1: | 1 | 2  | 3  | 4   | 5   | 6   | 7   | 8   | 9    | 10   |
| Num  | 5 | 16 | 35 | 62  | 98  | 142 | 194 | 254 | 322  | 398  |
| Cum  | 6 | 22 | 57 | 119 | 217 | 359 | 553 | 807 | 1129 | 1527 |

-----

TD10=1527

Vertex symbols for selected sublattice

-----  
Ni1 Point (Schlafli) symbol: {4<sup>4</sup>.6<sup>6</sup>}

Extended point symbol:[4.4.4.4.6.6(3).6(5).6(5).6(5).6(5)]

-----  
Point (Schlafli) symbol for net: {4<sup>4</sup>.6<sup>6</sup>}

5-c net; uninodal net

ATTENTION! If the name below is written in a long notation s/... or s-d-G-n, this net is a subnet of the net s (see Manual for details)

Topological type: pcu/P m -3 m->P b c n (a-b,-2c,2a+2b; 1/2,0,0);Bond sets: 2,3,4,5:pcu (uninodal.ttd) {4<sup>4</sup>.6<sup>6</sup>} - VS [4.4.4.4.6.6(3).6(5).6(5).6(5)] (71251 types in 10 databases)

Elapsed time: 7.33 sec.

### Systre for complex 2

Structure #1 - "C20 N5 Ni2.50 O10".

Structure of dimension 3.

Given space group is P21/c.

4 nodes and 10 edges in repeat unit as given.

Structure is not connected.

Processing components separately.

=====  
Processing component 1:

    multiplicity = 3

Structure of dimension 3.

Given space group is P1.

4 nodes and 10 edges in repeat unit as given.

Given repeat unit is accurate.

Point group has 8 elements.

1 kind of node.

Equivalences for non-unique nodes:

    V2 --> V1

    V3 --> V1

    V4 --> V1

Coordination sequences:

    Node V1:    5 16 35 62 98 142 194 254 322 398

TD10 = 1527.0000

Ideal space group is Pmna.

Ideal group differs from given (Pmna vs P1).

Structure is new for this run.

Relaxed cell parameters:

    a = 1.99713, b = 1.42194, c = 1.42227

    alpha = 90.0000, beta = 90.0000, gamma = 90.0000

Cell volume: 4.03897

Relaxed positions:

Node V1: 0.00000 0.24647 0.25352

Edges:

0.00000 0.24647 0.25352 <-> 0.50000 0.24647 0.24648  
0.00000 0.24647 0.25352 <-> -0.00000 0.75353 0.74648  
0.00000 0.24647 0.25352 <-> -0.00000 -0.24647 0.74648  
0.00000 0.24647 0.25352 <-> -0.00000 -0.24647 -0.25352

Edge centers:

0.25000 0.24647 0.25000  
0.00000 0.50000 0.50000  
0.00000 0.00000 0.50000  
0.00000 0.00000 0.00000

Edge statistics: minimum = 0.99141, maximum = 1.00571, average = 1.00000

Angle statistics: minimum = 89.58849, maximum = 178.85225, average = 107.96411

Shortest non-bonded distance = 1.01976

Degrees of freedom: 5

Finished component 1.

Finished structure #1 - "C20 N5 Ni2.50 O10".

### Topological analysis for complex 3

#####

1:C30 H27 N6 Ni O4

#####

Topology for Ni1

-----

Atom Ni1 links by bridge ligands and has

| Common vertex with | R(A-A)  |         |         |          |         |   |
|--------------------|---------|---------|---------|----------|---------|---|
| Ni 1               | -0.4792 | 0.4963  | 0.1376  | (-1-1 0) | 10.225A | 1 |
| Ni 1               | 0.5208  | 1.4963  | 0.1376  | ( 0 0 0) | 10.225A | 1 |
| Ni 1               | -0.0208 | -0.0037 | 0.3624  | ( 0-1 0) | 12.922A | 1 |
| Ni 1               | -0.0208 | 1.9963  | 0.3624  | ( 0 1 0) | 12.922A | 1 |
| Ni 1               | 0.4792  | 0.5037  | -0.1376 | ( 0 1 0) | 13.595A | 1 |

-----

Structural group analysis

-----

-----

Structural group No 1

-----

Structure consists of 3D framework with Ni

Coordination sequences

-----

Ni1: 1 2 3 4 5 6 7 8 9 10  
Num 5 18 52 108 176 258 358 474 606 754  
Cum 6 24 76 184 360 618 976 1450 2056 2810

-----

TD10=2810

Vertex symbols for selected sublattice

-----  
Ni1 Point (Schlafli) symbol: {4<sup>2</sup>.6<sup>8</sup>}

Extended point symbol:[4.4.6.6.6.6.6(2).6(2).6(2).6(3)]

-----  
Point (Schlafli) symbol for net: {4<sup>2</sup>.6<sup>8</sup>}

5-c net; uninodal net

New topology, please, contact the authors (71251 types in 10 databases)

Elapsed time: 7.92 sec.

### Systre for complex 3

tructure #1 - "C30 H27 N6 Ni O4".

Structure of dimension 3.

Given space group is C2/c.

4 nodes and 10 edges in repeat unit as given.

Given repeat unit is accurate.

Point group has 8 elements.

1 kind of node.

Coordination sequences:

Node 1: 5 18 52 108 176 258 358 474 606 754

TD10 = 2810.0000

Ideal space group is Cccm.

Ideal group differs from given (Cccm vs C12/c1).

Structure is new for this run.

Relaxed cell parameters:

a = 1.82038, b = 0.82872, c = 3.11956

alpha = 90.0000, beta = 90.0000, gamma = 90.0000

Cell volume: 4.70609

Relaxed positions:

Node 1: 0.00000 0.00000 0.66063

Edges:

0.00000 0.00000 0.66063 <-> 0.00000 1.00000 0.83937

0.00000 0.00000 0.66063 <-> 0.00000 -0.00000 0.33937

0.00000 0.00000 0.66063 <-> 0.50000 -0.50000 0.66063

Edge centers:

0.00000 0.50000 0.75000

0.00000 -0.00000 0.50000

0.25000 -0.25000 0.66063

Edge statistics: minimum = 0.99884, maximum = 1.00219, average = 1.00000

Angle statistics: minimum = 69.89379, maximum = 180.00000, average = 108.00000

Shortest non-bonded distance = 0.55759

Degrees of freedom: 4

Finished structure #1 - "C30 H27 N6 Ni O4".

#### Topological analysis for complex 4

#####

2:C44 H36 N10 Ni2 O15

#####

Topology for Cr1

-----

Atom Cr1 links by bridge ligands and has

| Common vertex with                    | R(A-A)  |   |  |  |  |  |
|---------------------------------------|---------|---|--|--|--|--|
| Cr 1 0.7500 0.2500 0.5000 ( 1 0 0)    | 9.674A  | 1 |  |  |  |  |
| Cr 1 -0.2500 0.2500 -0.5000 ( 0 0 -1) | 9.674A  | 1 |  |  |  |  |
| Cr 1 -0.2500 0.7500 -1.0000 ( 0 1 -1) | 15.642A | 1 |  |  |  |  |
| Cr 1 0.7500 -0.2500 1.0000 ( 1 0 1)   | 15.642A | 1 |  |  |  |  |
| Cr 1 0.2500 0.2500 -1.0000 ( 0 0 -1)  | 16.465A | 1 |  |  |  |  |
| Cr 1 0.2500 0.2500 1.0000 ( 0 0 1)    | 16.465A | 1 |  |  |  |  |

-----

Structural group analysis

-----

-----

Structural group No 1

-----

Structure consists of 3D framework with Cr

Coordination sequences

-----

|      |   |    |    |     |     |     |      |      |      |      |
|------|---|----|----|-----|-----|-----|------|------|------|------|
| Cr1: | 1 | 2  | 3  | 4   | 5   | 6   | 7    | 8    | 9    | 10   |
| Num  | 6 | 22 | 56 | 110 | 182 | 272 | 380  | 506  | 650  | 812  |
| Cum  | 7 | 29 | 85 | 195 | 377 | 649 | 1029 | 1535 | 2185 | 2997 |

-----

TD10=2997

Vertex symbols for selected sublattice

-----

Cr1 Point (Schlafli) symbol: {4^8.5^2.6^5}

Extended point symbol:[4.4.4.4.4.4.4.5(3).5(3).6(2).6(3).6(3).6(4).6(4)]

-----

Point (Schlafli) symbol for net: {4^8.5^2.6^5}

6-c net; uninodal net

ATTENTION! If the name below is written in a long notation s/... or s-d-G-n, this net is a subnet of the net s (see Manual for details)

Topological type: bcu-x/ 14-conn;I m -3 m->C 2/c (-a-b,a-b,c; 0,1/2,0);Bond sets: 2,5,6:bcu-x (uninodal.ttd) {4^8.5^2.6^5} - VS [4.4.4.4.4.4.4.5(3).5(3).6.6(2).\*. \*] (71251 types in 10 databases)

Elapsed time: 8.16 sec.
